# Supplementary material for: Side chain to main chain hydrogen bonds stabilize a polyglutamine helix in a transcription factor
Source: PubMed Central journal article supplement (PMC6497633; doi:10.1038/s41467-019-09923-2), 2019-05-02
Supplement: 41467_2019_9923_MOESM1_ESM.pdf [file 41467_2019_9923_MOESM1_ESM.pdf]

## Side chain to main chain hydrogen bonds stabilize a polyglutamine helix in a transcription factor

A. Escobedo, B. Topal et al.

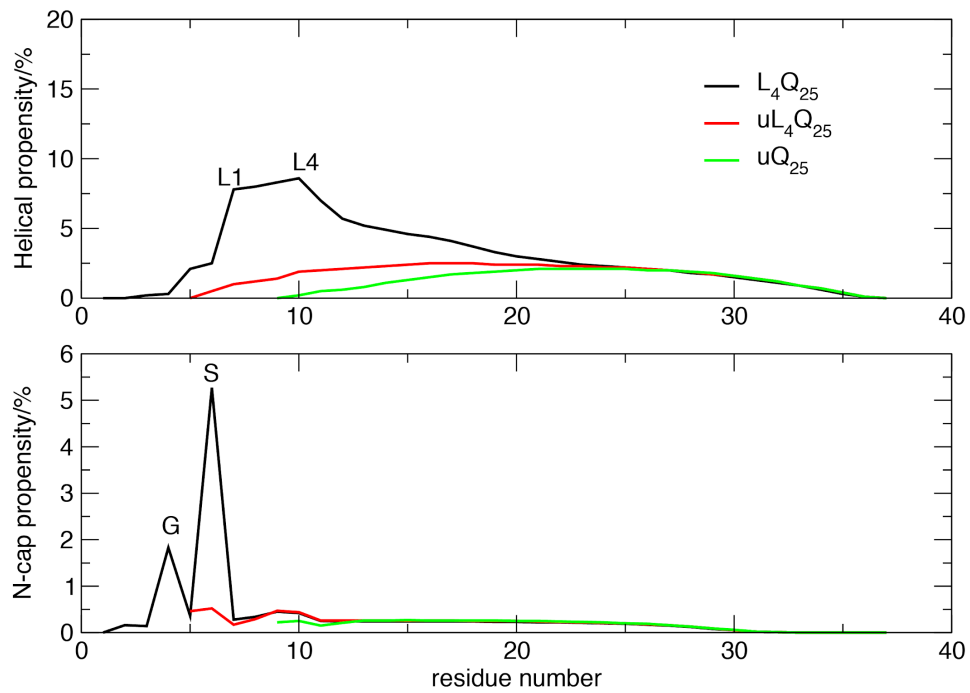

**Supplementary Figure 1** | Prediction of helical and N-cap propensity, for peptides  $uQ_{25}$ ,  $uL_4Q_{25}$  and  $L_4Q_{25}$  obtained by using Agadir<sup>1</sup>. The peptides have been aligned so that the Gln residues, that are common to all of them, have the same residue numbers (Q11-Q35).

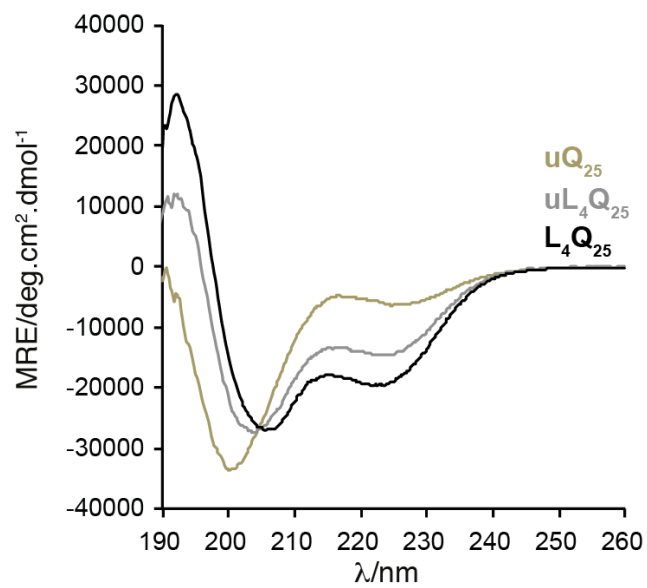

**Supplementary Figure 2** | CD spectra of uQ<sub>25</sub>, uL<sub>4</sub>Q<sub>25</sub> and L<sub>4</sub>Q<sub>25</sub>.

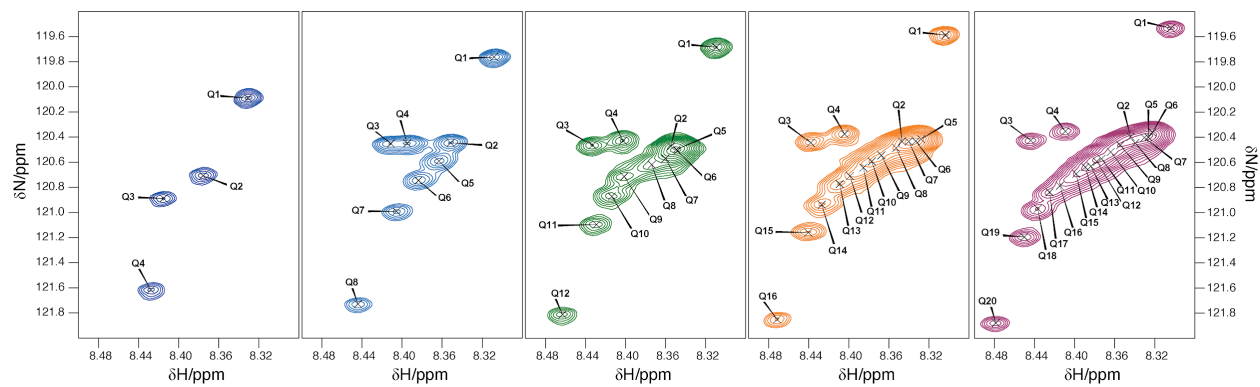

**Supplementary Figure 3** | Region of the  $^1\text{H}$ ,  $^{15}\text{N}$  HSQC spectrum of peptides L<sub>4</sub>Q<sub>4</sub> to L<sub>4</sub>Q<sub>20</sub> showing the resonances belonging to the backbone amide groups of Gln residues.

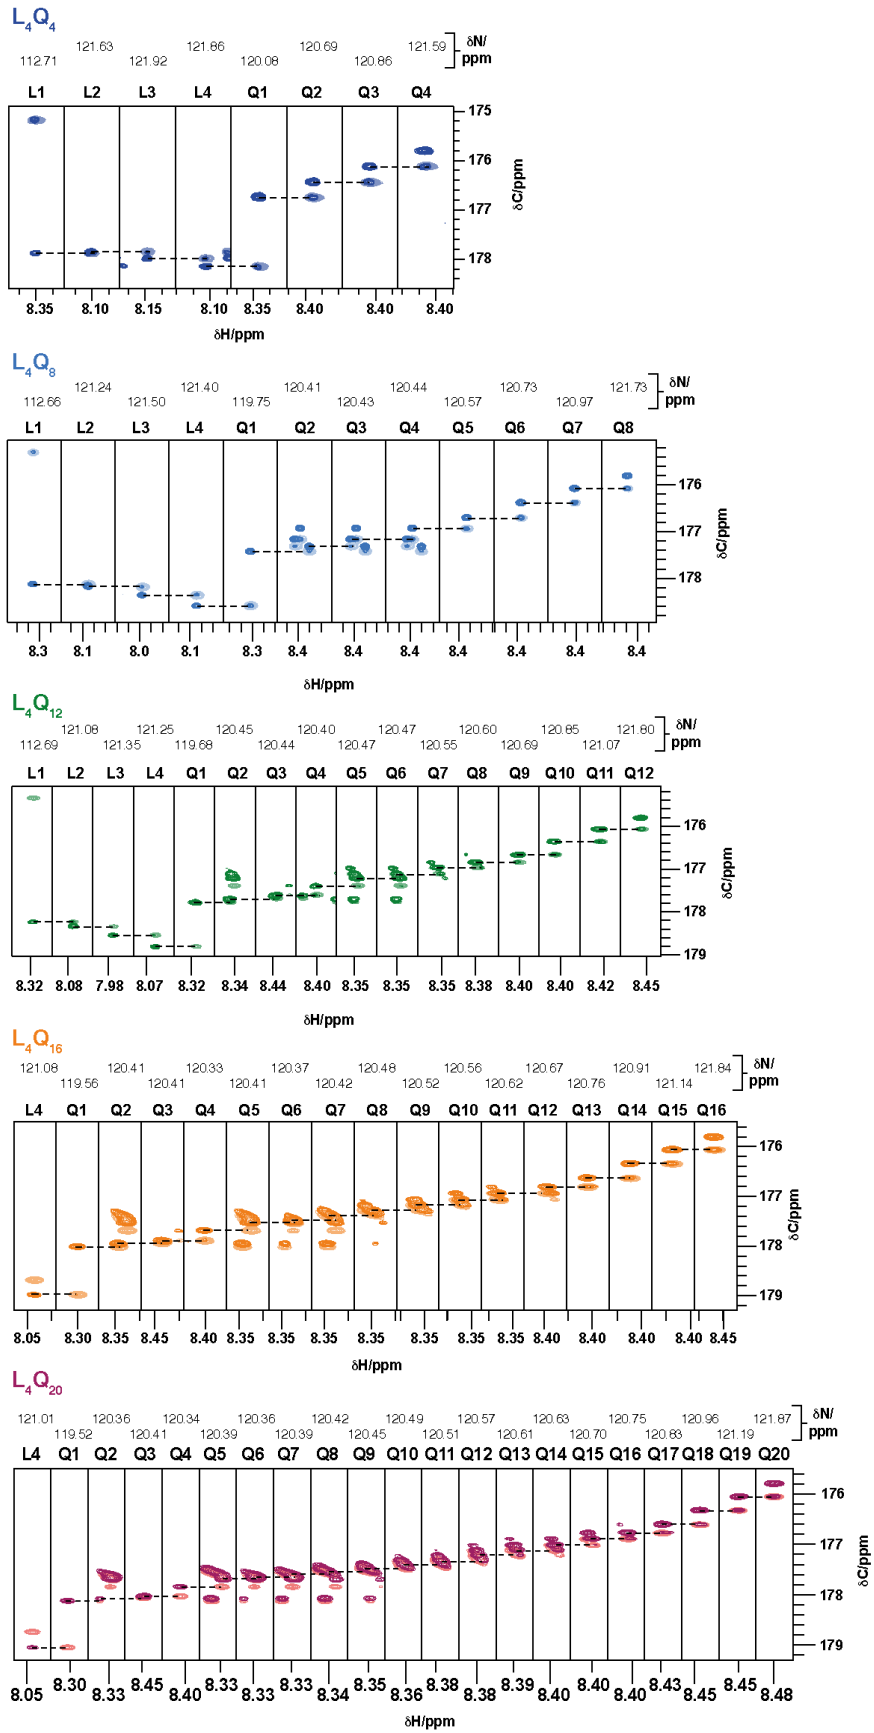

**Supplementary Figure 4** | HNCO (light) and HN(CA)CO (dark) spectra of peptides L<sub>4</sub>Q<sub>4</sub> to L<sub>4</sub>Q<sub>16</sub> used for the assignment of the backbone resonances.

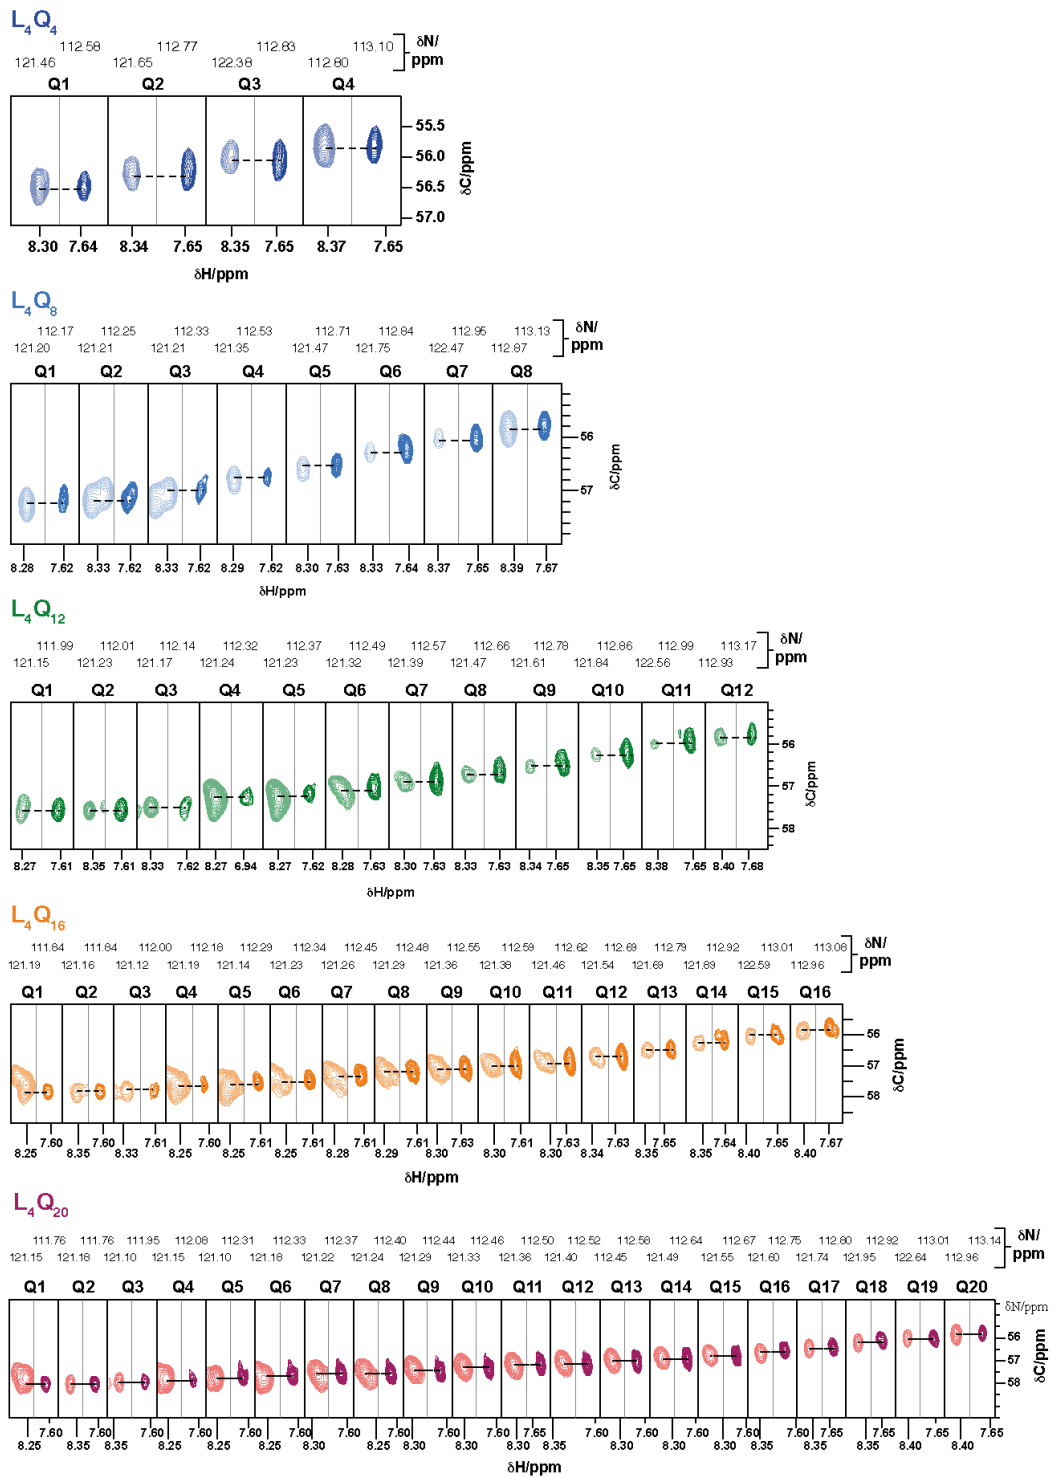

**Supplementary Figure 5** | Strip plots showing the C $\alpha$  cross-peaks correlated to the main chain NH resonances in the HN(CO)CACB experiment (light) and side chain NH $\epsilon_{21}$  resonances in the (H)CC(CO)NH experiment (dark), used in the assignment of the latter.

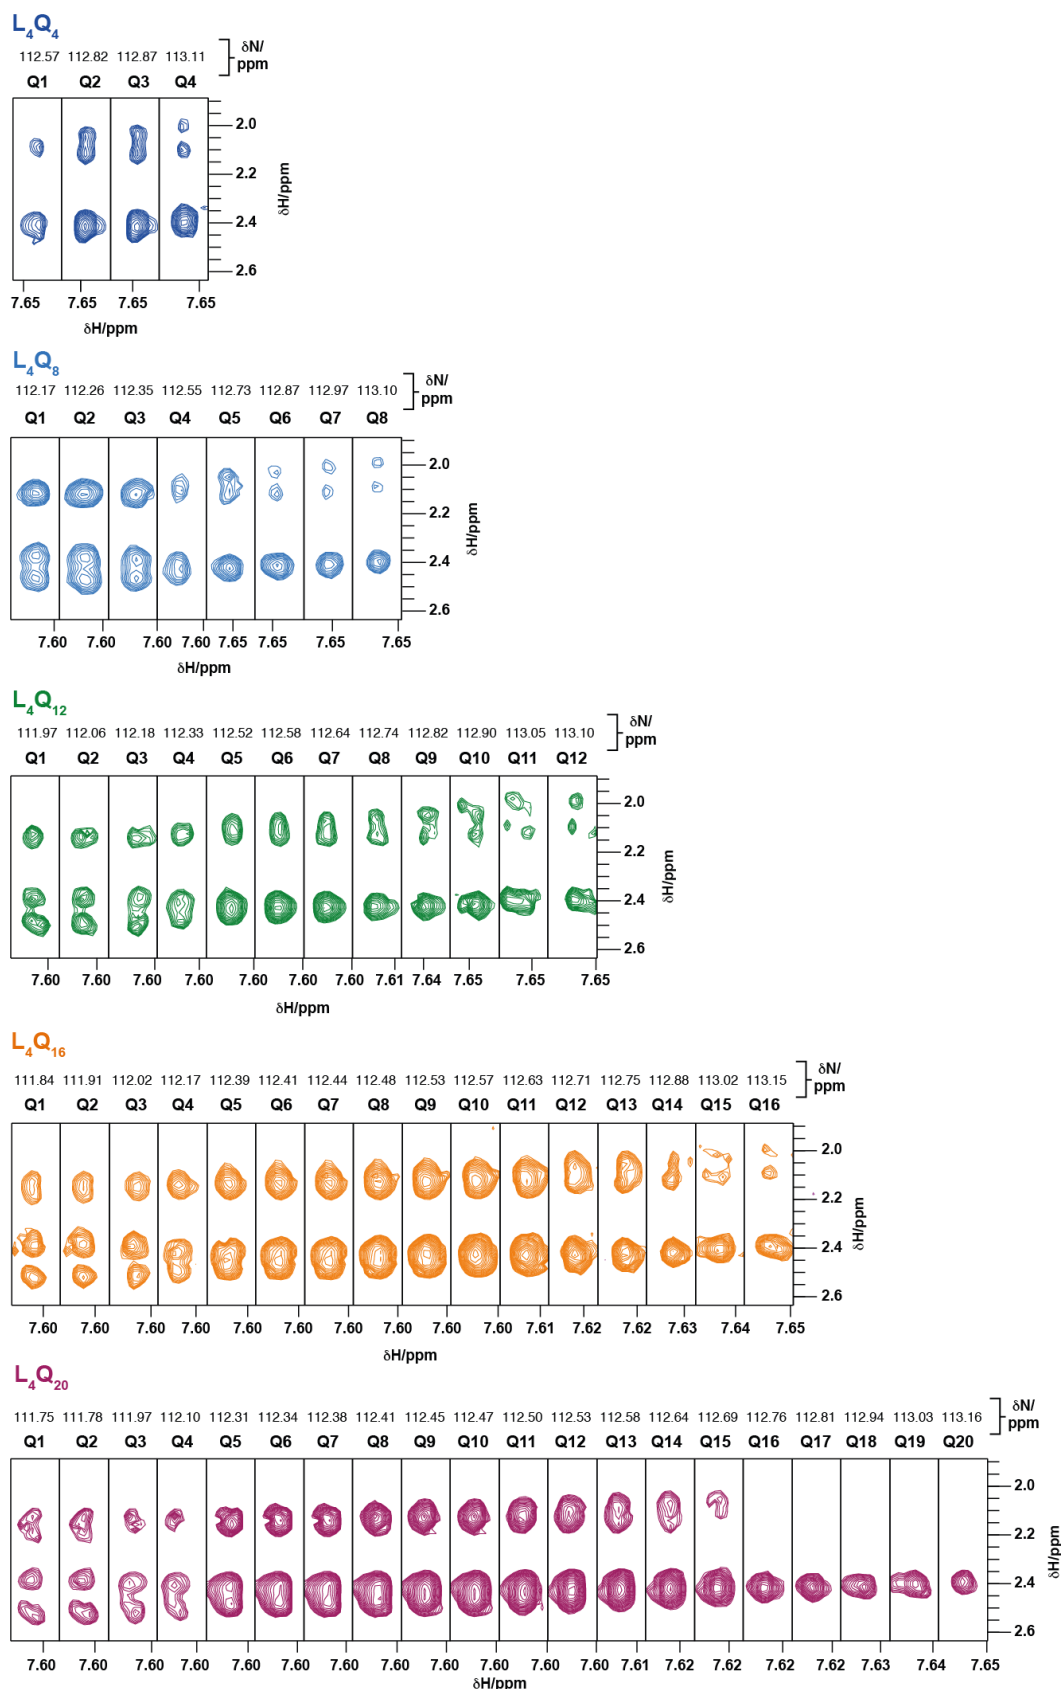

**Supplementary Figure 6** | H<sub>ε21</sub>-centered regions of the <sup>15</sup>N planes of the H(CC)(CO)NH spectra of peptides L<sub>4</sub>Q<sub>4</sub> to L<sub>4</sub>Q<sub>20</sub> containing the side chain aliphatic <sup>1</sup>H resonances of all residues of the polyQ tract.

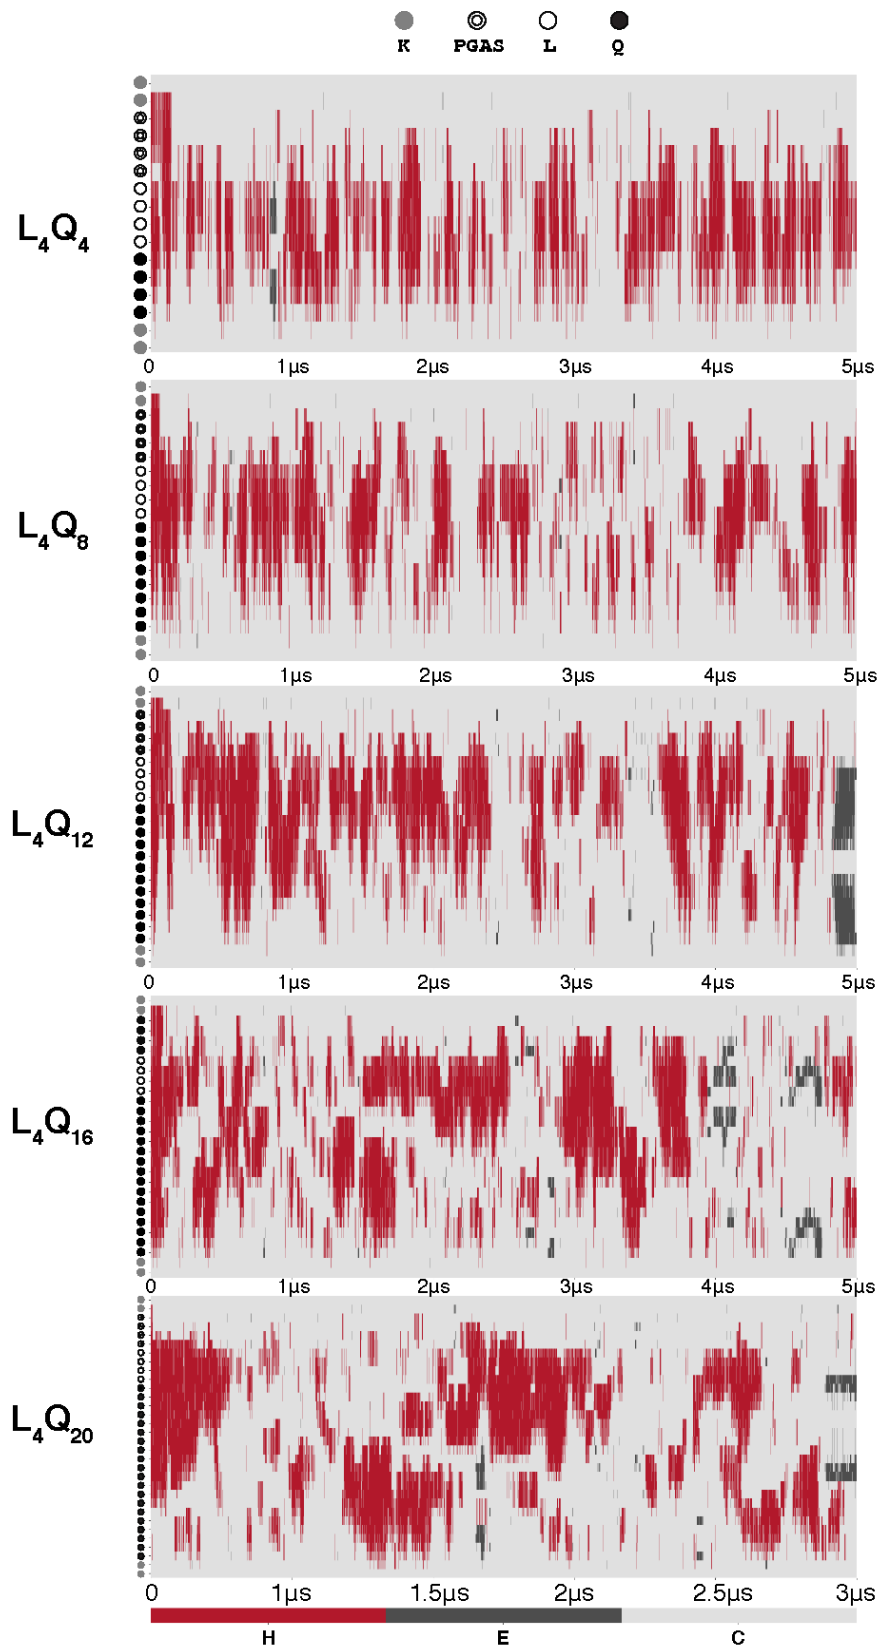

**Supplementary Figure 7** | Time series of the secondary structure of peptides  $L_4Q_4$  to  $L_4Q_{20}$  as obtained by using the algorithm DSSP<sup>2</sup> where H stands for helix, in red; E stands for extended, in dark gray; and C stands for coil, in light gray.

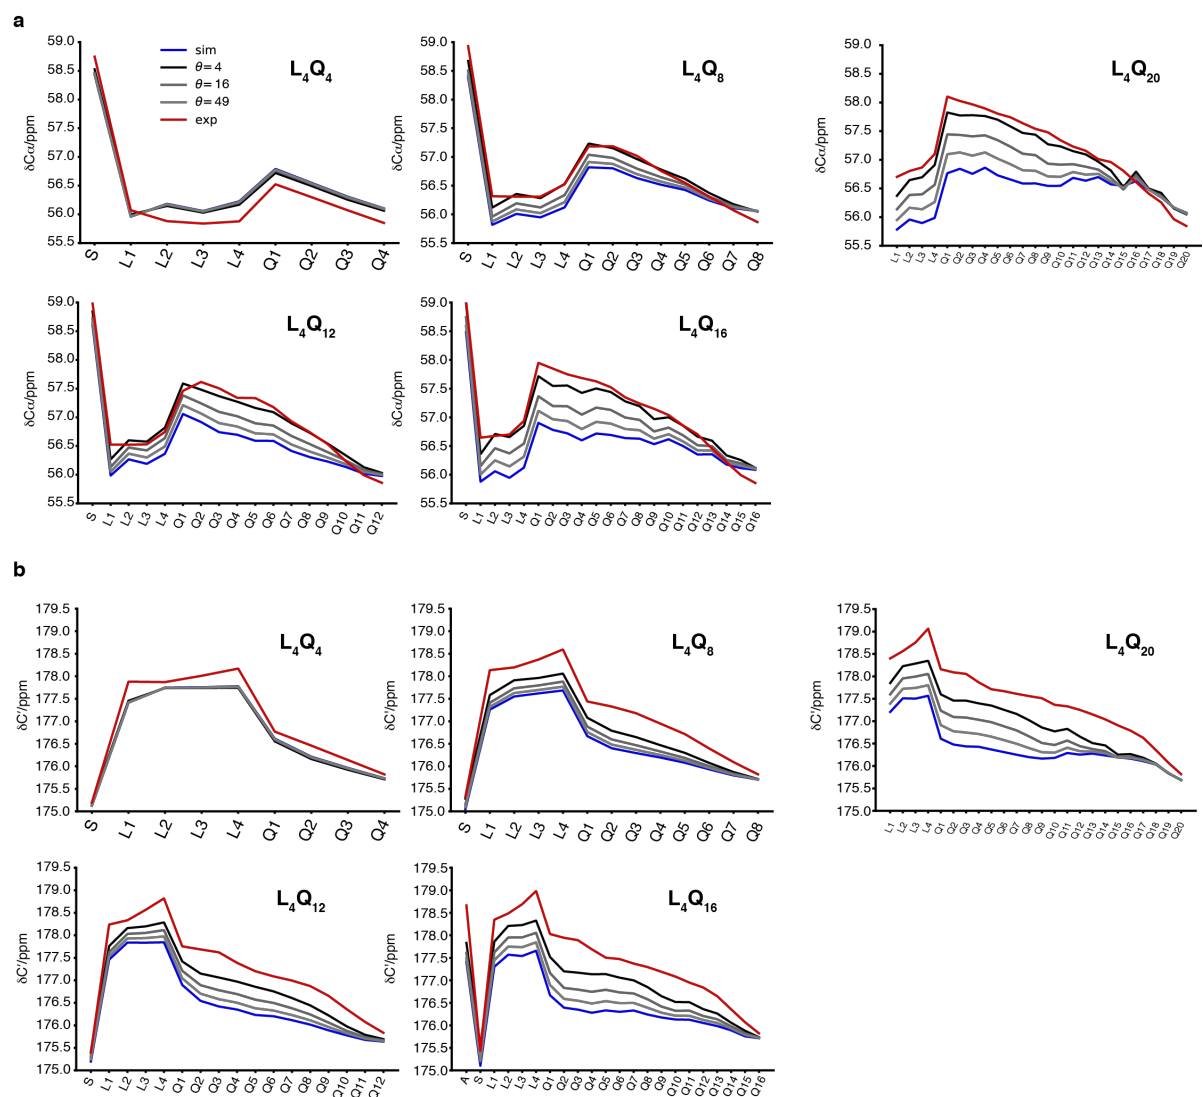

**Supplementary Figure 8** | Experimental and back-calculated (a)  $C_{\alpha}$  and (b)  $C_{\beta}$  chemical shifts of peptides  $L_4Q_4$  to  $L_4Q_{20}$  from the reweighted trajectories obtained with different values of the parameter  $\theta$ , that determines the degree of reweighting applied in the ME algorithm.



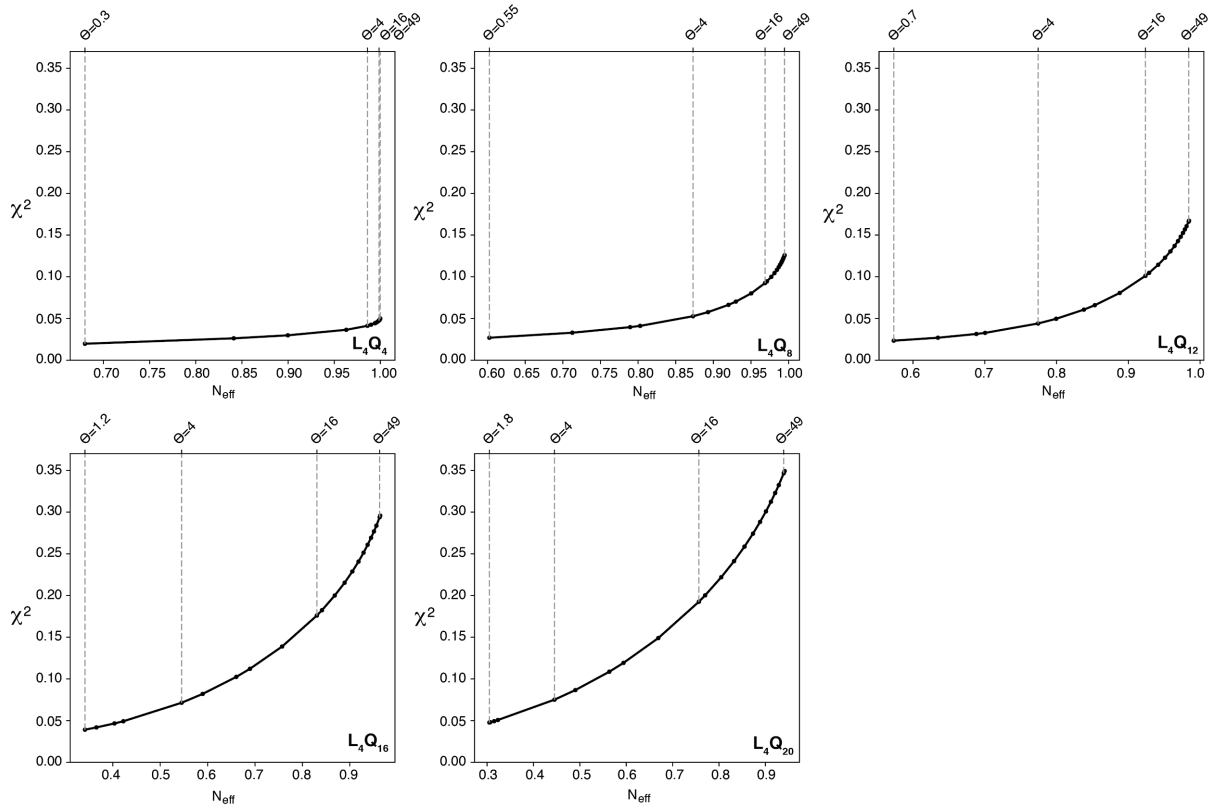

**Supplementary Figure 9** | Effective fraction of frames after reweighting vs  $\chi^2$  for different values of  $\theta$ .  $N_{\text{eff}}$  was calculated as  $\exp(S_{\text{rel}})$  with  $S_{\text{rel}}$  being the relative entropy term in the BME reweighting approach. In short,  $N_{\text{eff}}$  quantifies the effective fraction of frames that are left after the trajectory has been reweighted to fit the data to an extent measured by  $\chi^2$ .

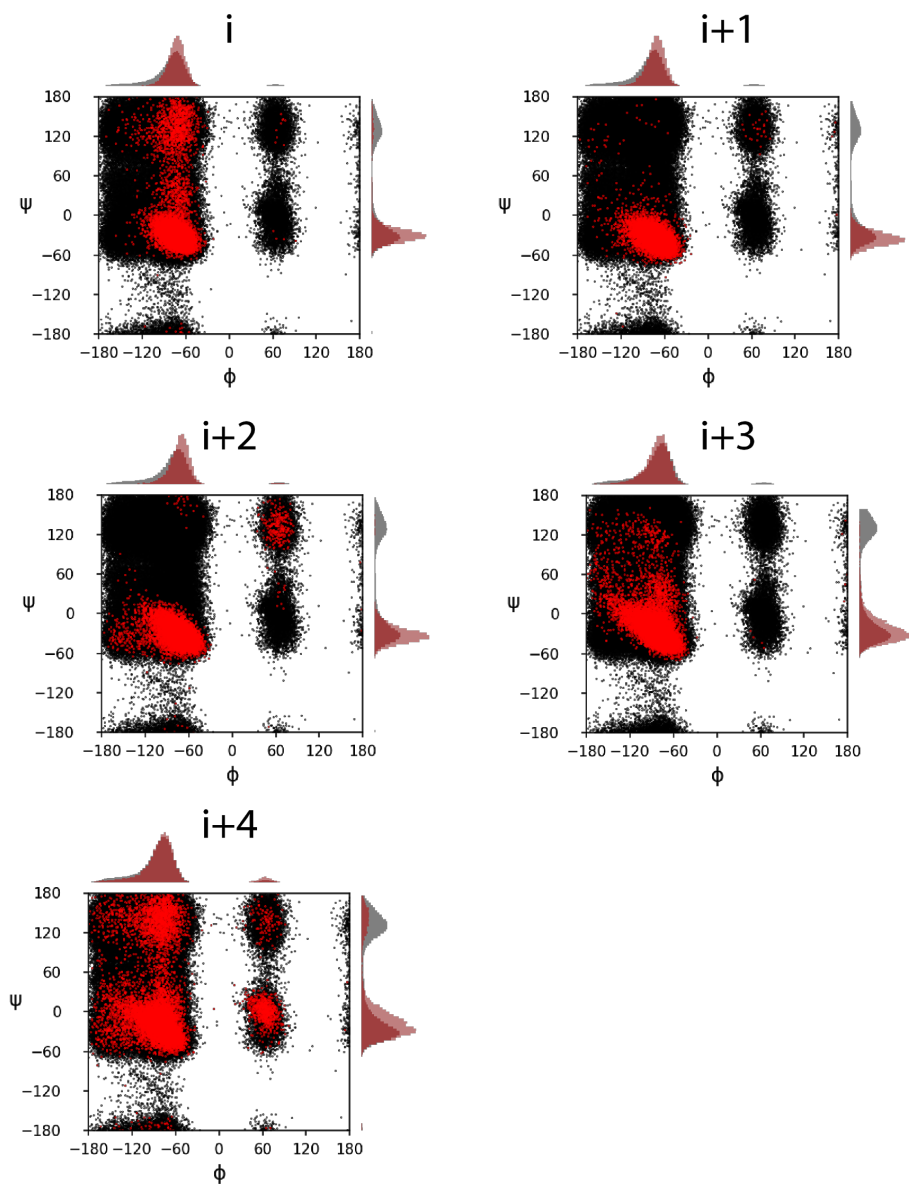

**Supplementary Figure 10** | 2D histogram, in red, of backbone torsion angles  $\phi$  and  $\psi$  for segments of five residues where the first and last residue are involved in a  $(i+4 \rightarrow i)$  side chain to main chain hydrogen bond. In black we show the result obtained when these residues are not involved in such interaction.

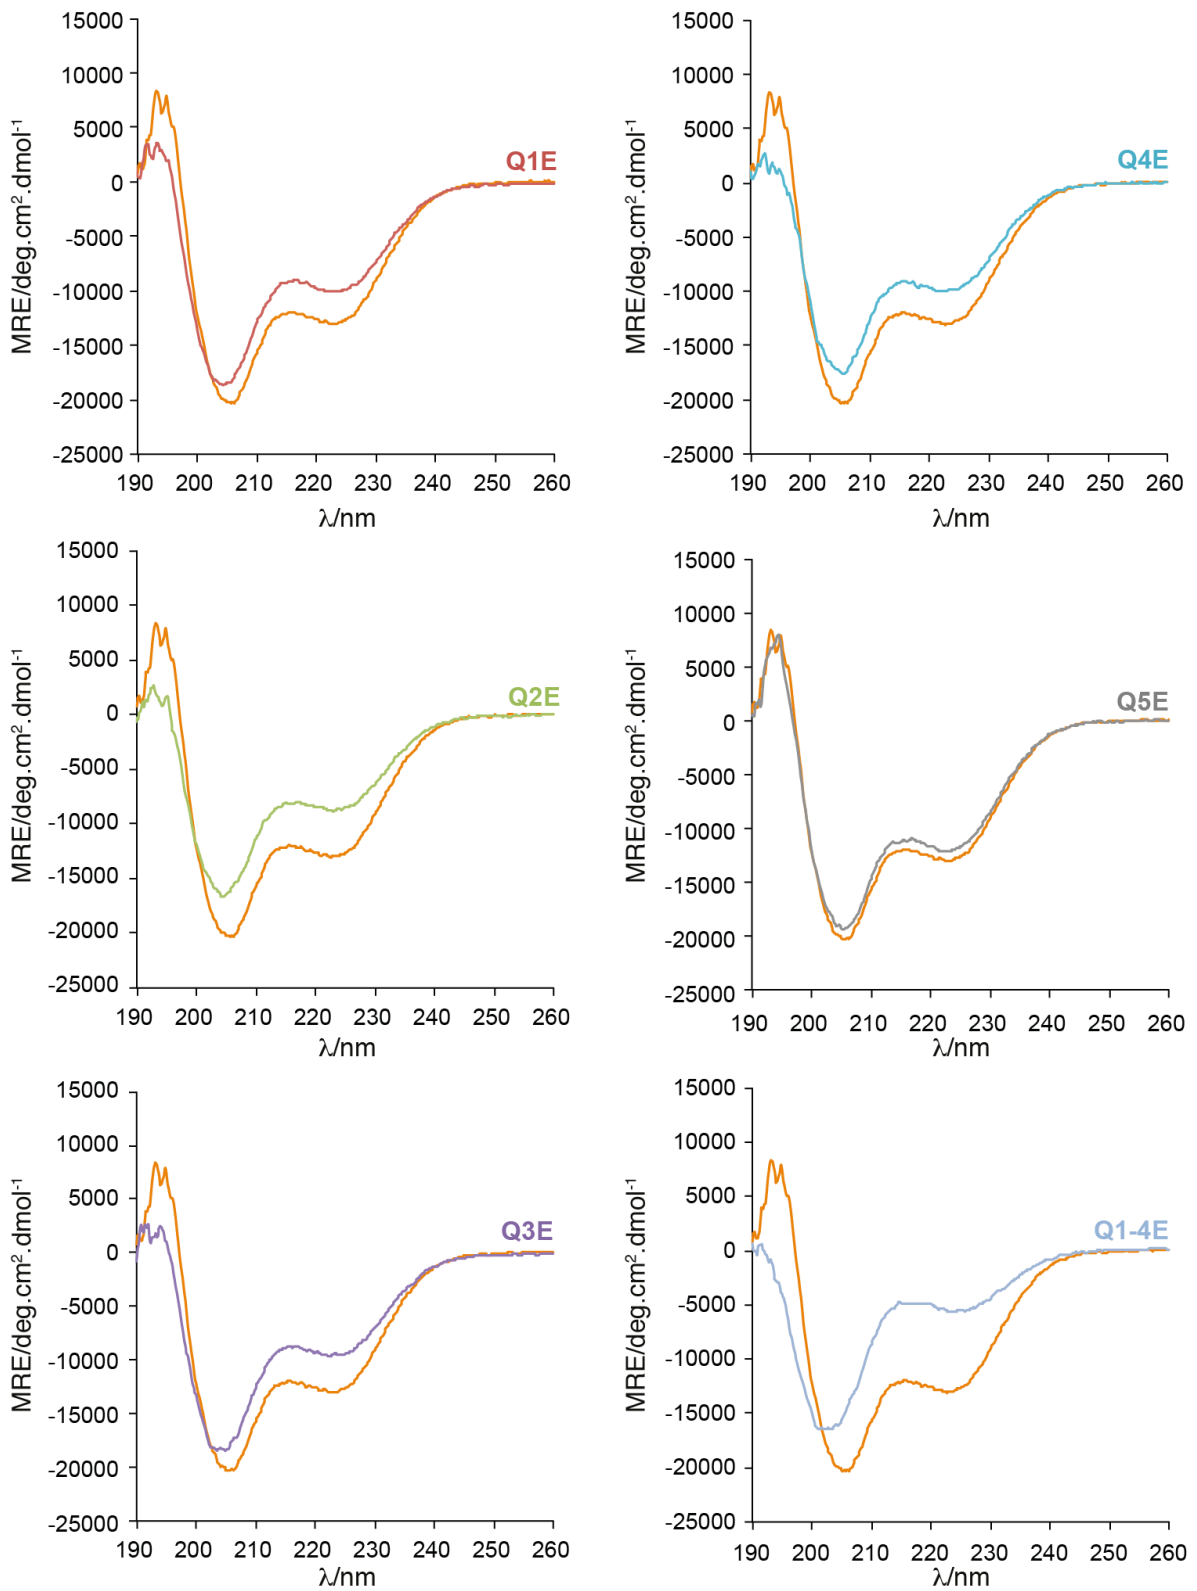

**Supplementary Figure 11** | Comparison of the CD spectra of peptides Q1E to Q5E, as well as that of peptide Q1-4E, to that of peptide L<sub>4</sub>Q<sub>16</sub>, shown in orange in all plots.

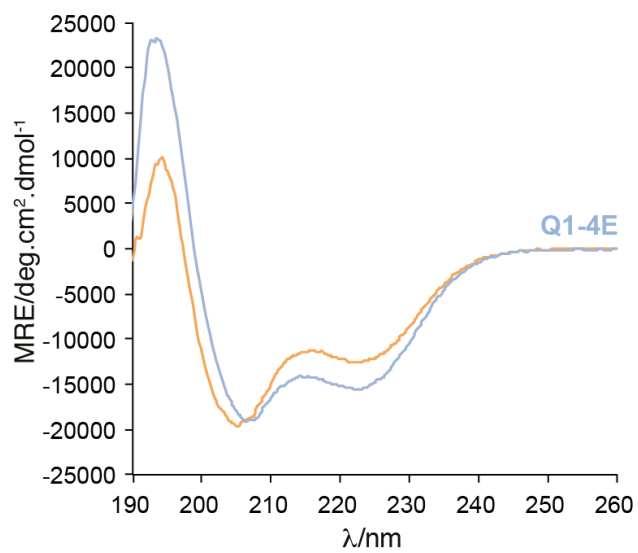

**Supplementary Figure 12** | CD spectra of peptides L<sub>4</sub>Q<sub>16</sub> (in orange) and Q1-4E at pH 2

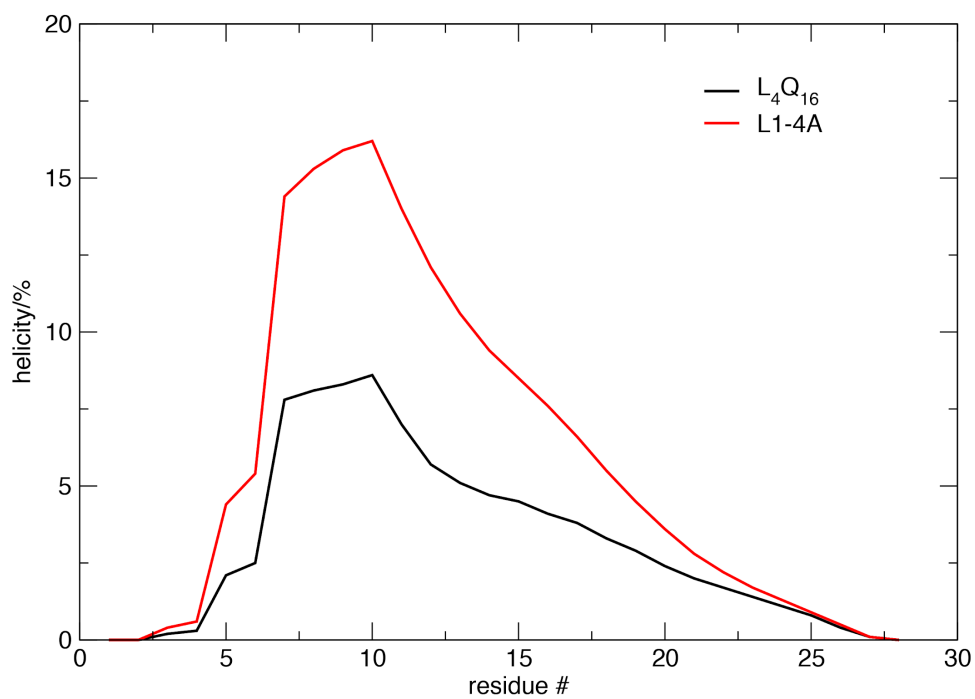

**Supplementary Figure 13** | Prediction of the helicities of peptides L<sub>4</sub>Q<sub>16</sub> and L1-4A obtained by using Agadir<sup>1</sup>.

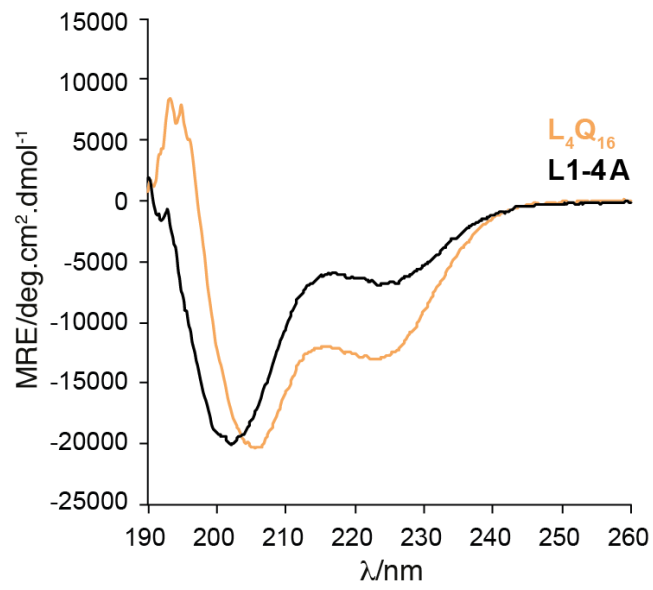

**Supplementary Figure 14** | Comparison of the CD spectrum of peptide L1-4A, to that of peptide L<sub>4</sub>Q<sub>16</sub>.

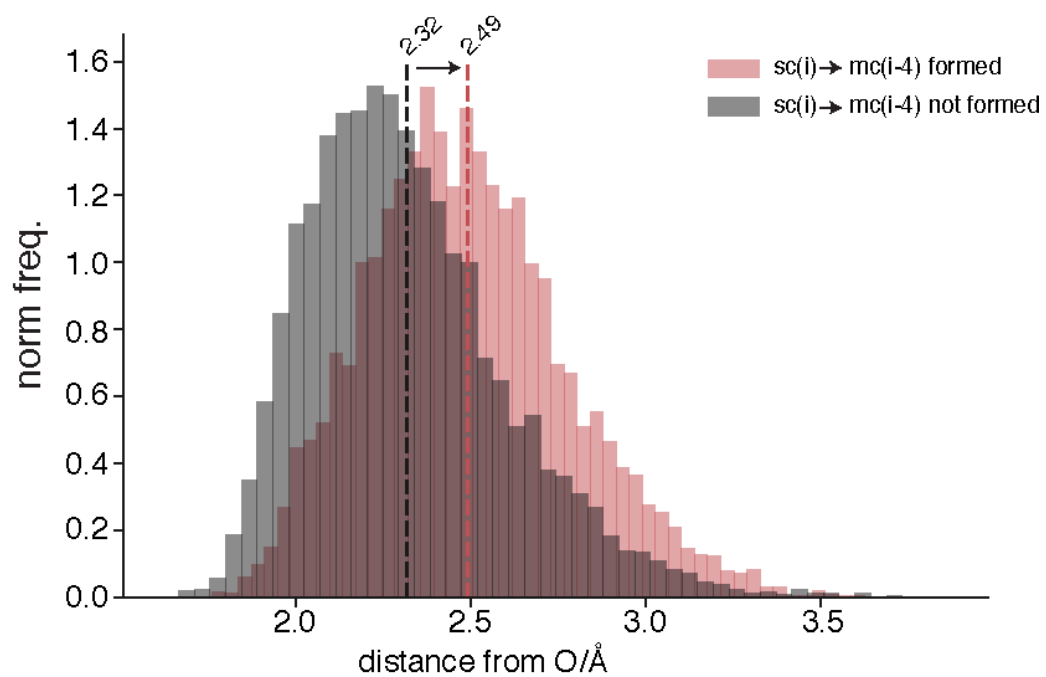

**Supplementary Figure 15** | Distribution of the distance between the main chain NH of Q1 and the main chain CO of L1 in the absence and in the presence of the sc(Q1)→mc(L1) hydrogen bond.

**L<sub>4</sub>Q<sub>4</sub>**

ATGAGCGATAGCGAAGTTAATCAAGAAGCCAAACCGGAAGTTAAGCCGGAAGTGAAACCTG  
AAACACATATTAACCTGAAAGTGAGTGATGGCAGCAGCGAAATCTTCTTCAAATCAAAAA  
ACCACACCGCTGCGTCGTCTGATGGAAGCATTGCAAAACGTCAGGGTAAAGAAATGGATA  
GCCTGCGTTTTCTGTATGATGGTATTCGTATTCAGGCAGATCAGACACCGGAAGATCTGGAT  
ATGGAAGATAACGATATTATCGAAGCACATCGTGAGCAGATTGGTGGTAAAAAACCGGGTG  
CAAGCCTGCTGTTACTGCAGCAGCAACAGAAAAATGATAA

**L<sub>4</sub>Q<sub>8</sub>**

ATGAGCGATAGCGAAGTTAATCAAGAAGCCAAACCGGAAGTTAAGCCGGAAGTGAAACCTG  
AAACACATATTAACCTGAAAGTGAGTGATGGCAGCAGCGAAATCTTCTTCAAATCAAAAA  
ACCACACCGCTGCGTCGTCTGATGGAAGCATTGCAAAACGTCAGGGTAAAGAAATGGATA  
GCCTGCGTTTTCTGTATGATGGTATTCGTATTCAGGCAGATCAGACACCGGAAGATCTGGAT  
ATGGAAGATAACGATATTATCGAAGCACATCGTGAGCAGATTGGTGGTAAAAAACCGGGTG  
CAAGCCTGCTGCTGCTTCAGCAGCAACAACAGCAACAGCAGAAAAAGTGATAA

**L<sub>4</sub>Q<sub>12</sub>**

ATGAGCGATAGCGAAGTTAATCAAGAAGCCAAACCGGAAGTTAAGCCGGAAGTGAAACCTG  
AAACACATATTAACCTGAAAGTGAGTGATGGCAGCAGCGAAATCTTCTTCAAATCAAAAA  
ACCACACCGCTGCGTCGTCTGATGGAAGCATTGCAAAACGTCAGGGTAAAGAAATGGATA  
GCCTGCGTTTTCTGTATGATGGTATTCGTATTCAGGCAGATCAGACACCGGAAGATCTGGAT  
ATGGAAGATAACGATATTATCGAAGCACATCGTGAGCAGATTGGTGGTAAAAAACCGGGTG  
CAAGCCTGCTGCTGCTTCAGCAGCAACAACAACAGCAACAGCAACAACAGCAGAAGAAGTG  
ATAA

**L<sub>4</sub>Q<sub>16</sub>**

ATGAGCGATAGCGAAGTTAATCAAGAAGCCAAACCGGAAGTTAAGCCGGAAGTGAAACCTG  
AAACACATATTAACCTGAAAGTGAGTGATGGCAGCAGCGAAATCTTCTTCAAATCAAAAA  
ACCACACCGCTGCGTCGTCTGATGGAAGCATTGCAAAACGTCAGGGTAAAGAAATGGATA  
GCCTGCGTTTTCTGTATGATGGTATTCGTATTCAGGCAGATCAGACACCGGAAGATCTGGAT  
ATGGAAGATAACGATATTATCGAAGCACATCGTGAGCAGATTGGTGGTAAAAAACCGGGTG  
CAAGCCTGCTGCTGCTTCAGCAGCAACAACAACAGCAACAGCAACAACAGCAACAACA  
ACAGAAAAAGTAATAA

**L<sub>4</sub>Q<sub>20</sub>**

ATGAGCGATAGCGAAGTTAATCAAGAAGCCAAACCGGAAGTTAAGCCGGAAGTGAAACCTG  
AAACACATATTAACCTGAAAGTGAGTGATGGCAGCAGCGAAATCTTCTTCAAATCAAAAA  
ACCACACCGCTGCGTCGTCTGATGGAAGCATTGCAAAACGTCAGGGTAAAGAAATGGATA  
GCCTGCGTTTTCTGTATGATGGTATTCGTATTCAGGCAGATCAGACACCGGAAGATCTGGAT  
ATGGAAGATAACGATATTATCGAAGCACATCGTGAGCAGATTGGTGGTAAAAAACCGGGTG  
CAAGCCTGCTGCTGCTTCAGCAGCAACAACAACAGCAACAGCAACAACAGCAACAACA  
ACAACAGCAGCAACAGAAGAAATGATAA

**Supplementary Table 1** | Codon-optimized sequences used for the expression of peptides  
L<sub>4</sub>Q<sub>4</sub> to L<sub>4</sub>Q<sub>20</sub>



### Supplementary References

1. Muñoz, V. & Serrano, L. Elucidating the folding problem of helical peptides using empirical parameters. *Nat. Struct. Biol.* **1**, 399–409 (1994).
2. Kabsch, W. & Sander, C. Dictionary of protein secondary structure: pattern recognition of hydrogen-bonded and geometrical features. *Biopolymers* **22**, 2577–2637 (1983).
